# Supplementary material for: Epicardial HDAC3 promotes myocardial growth through a novel microRNA pathway
Source: bioRxiv or medRxiv preprint supplement (doi:10.1101/2021.09.16.460538), 2021-09-16
Supplement: Supplementary file [file media-1.pdf]

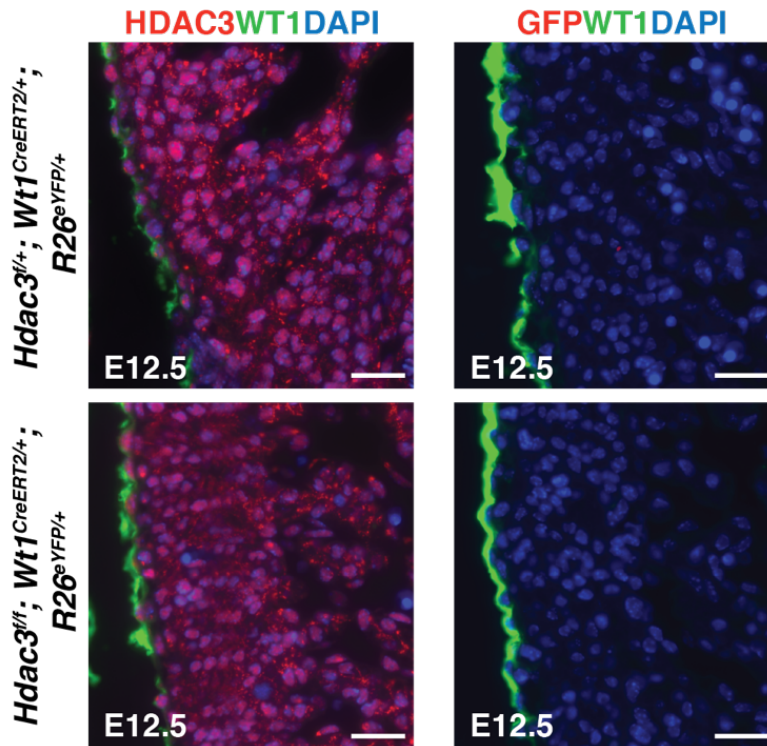

**Supplemental Figure 1. No leakage of *Wt1<sup>CreERT2/+</sup>*.**

Representative micrographs of HDAC3 and GFP immunofluorescence staining of E12.5 *Hdac3<sup>f/+</sup>; Wt1<sup>CreERT2/+</sup>; R26<sup>eYFP/+</sup>* and *Hdac3<sup>f/f</sup>; Wt1<sup>CreERT2/+</sup>; R26<sup>eYFP/+</sup>* hearts. Corn oil was given to dams intraperitoneally (150 mg/kg body weight) at E8.5 (scale bars: 25  $\mu$ m). eYFP immunosignal was detected by GFP antibody. In the absence of tamoxifen administration, there was neither *Hdac3* deletion nor eYFP reporter activity in the epicardium.

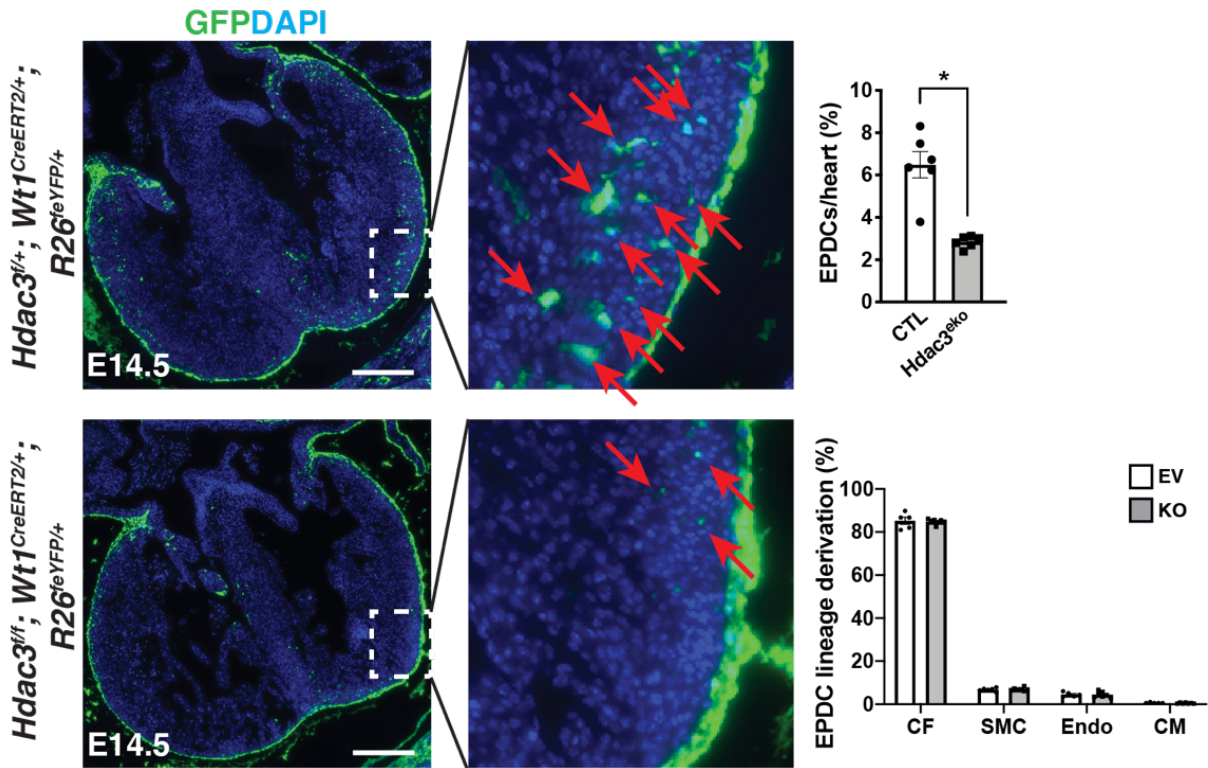

### Supplemental Figure 2. Reduction of EPDCs in *Hdac3<sup>eko</sup>* hearts.

Representative micrographs of GFP immunofluorescence staining of E14.5 *Hdac3<sup>fl/+</sup>; Wt1<sup>CreERT2/+</sup>; R26<sup>eYFP/+</sup>* (control [CTL]) and *Hdac3<sup>fl/fl</sup>; Wt1<sup>CreERT2/+</sup>; R26<sup>eYFP/+</sup>* (*Hdac3<sup>eko</sup>*) hearts. Quantifications of percentage of EPDCs/heart and derivation percentage of each cell type are shown on the right (\* $P < 0.05$  by Student's *t*-test; CF, cardiac fibroblast (Vimentin+); SMC, smooth muscle cells (smMHC11+); Endo, endothelial cells (CD31+); CM, cardiomyocyte (ACTC1+); scale bar, 250  $\mu$ m). EPDCs (GFP+, denoted by red arrows) were significantly fewer in *Hdac3<sup>eko</sup>* hearts as compared to CTL hearts, whereas the contribution to each lineage by EPDCs was not significantly different between *Hdac3<sup>eko</sup>* and CTL hearts.

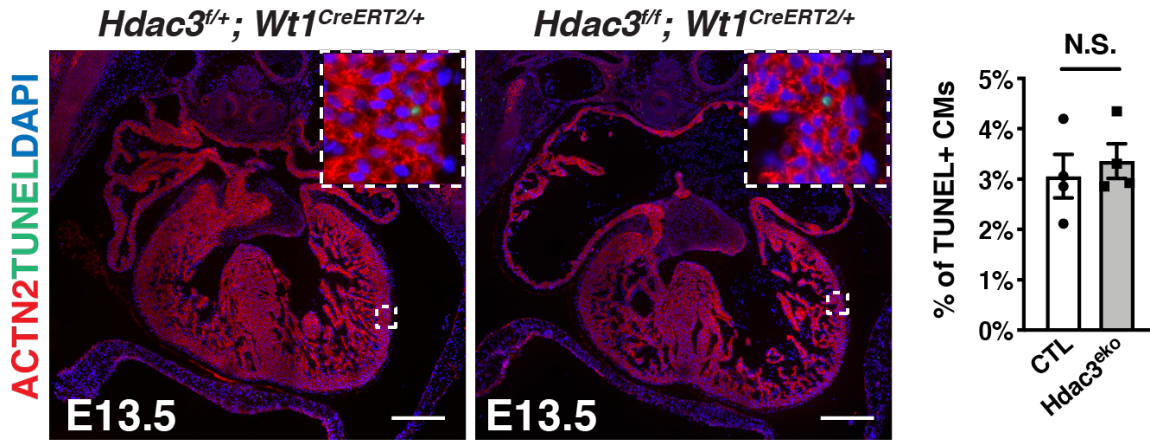

**Supplemental Figure 3. No significant change for cell death in *Hdac3<sup>eko</sup>* hearts.**

Representative micrographs of TUNEL staining of E13.5 *Hdac3<sup>f/f</sup>; Wt1<sup>CreERT2/+</sup>* (*Hdac3<sup>eko</sup>*) and *Hdac3<sup>f/+</sup>; Wt1<sup>CreERT2/+</sup>* (CTL) and hearts. TUNEL+ signals are in green. Quantification of TUNEL+ cardiomyocytes (CMs) is shown on the right (N.S., not significant; scale bars: 250  $\mu$ m).

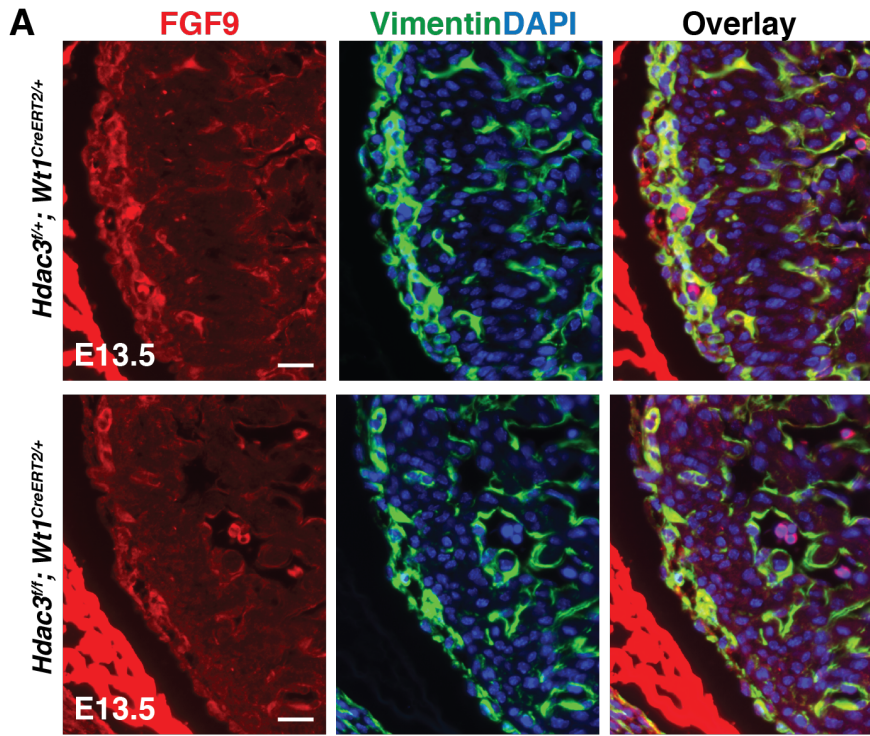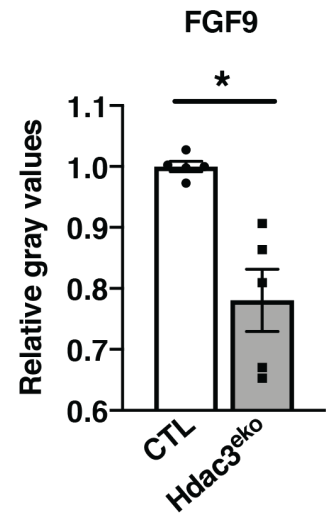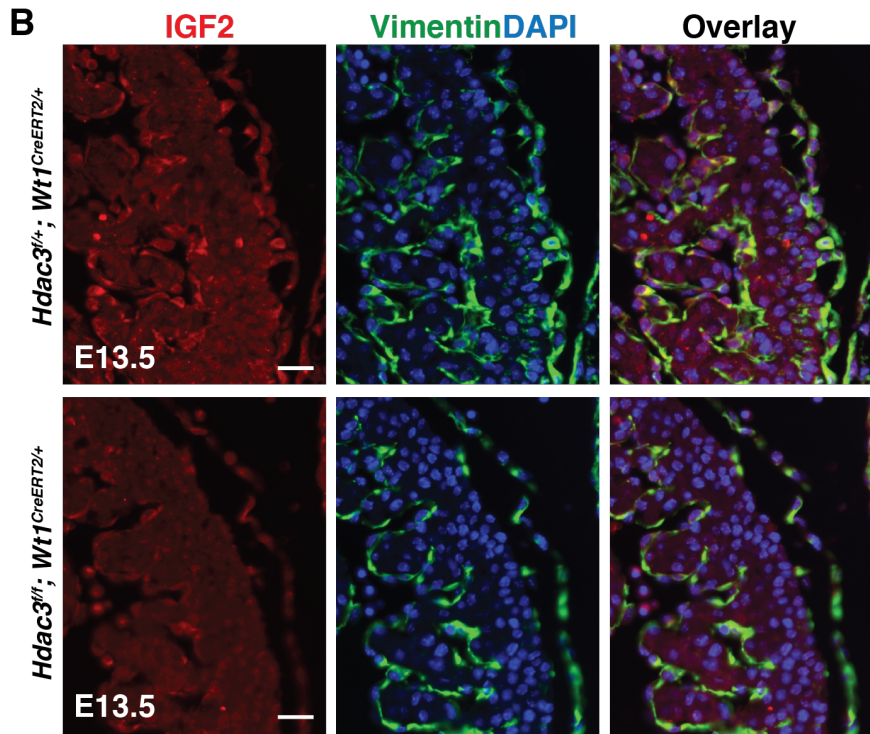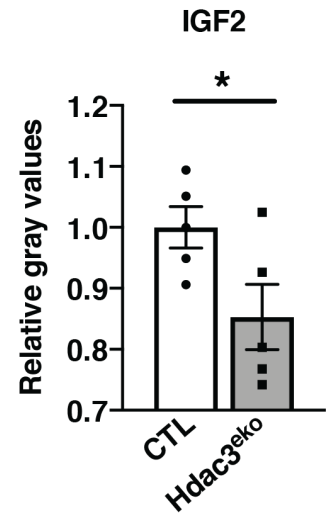

**Supplemental Figure 4. Reduced expression of FGF9 and IGF2 in *Hdac3<sup>eko</sup>* hearts.**

Representative immunofluorescence staining of FGF9 (A) and IGF2 (B) on E13.5 *Hdac3<sup>ff</sup>*; *Wt1<sup>CreERT2/+</sup>*; *R26R<sup>eYFP/+</sup>* and (*Hdac3<sup>eko</sup>*) *Hdac3<sup>f/+</sup>*; *Wt1<sup>CreERT2/+</sup>*; *R26R<sup>eYFP/+</sup>* (CTL) hearts. Vimentin was used to mark cardiac fibroblasts, cardiac endothelial cells and the epicardium. Quantifications of immunofluorescence intensity of FGF9 and IGF2 are shown on the right (scale bars: 25  $\mu$ m).

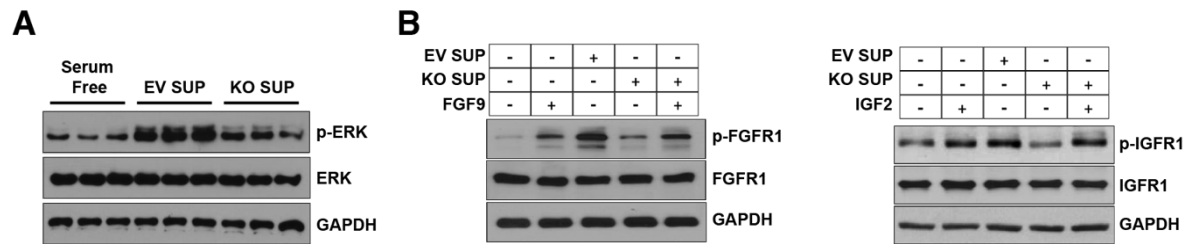

**Supplemental Figure 5. The downstream signaling of FGF9 or iGF2 in cultured cardiomyocytes.** Representative western blots of p-ERK, p-FGFR1, or p-IGF1R in serum-starved cultured E13.5 cardiomyocytes after treatment of MEC supernatants and/or mouse recombinant FGF9 or IGF2 proteins (final concentration: 100 ng/ml).

## Full unedited gels for

Figure 2A

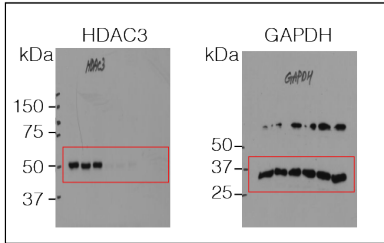

Figure 2E

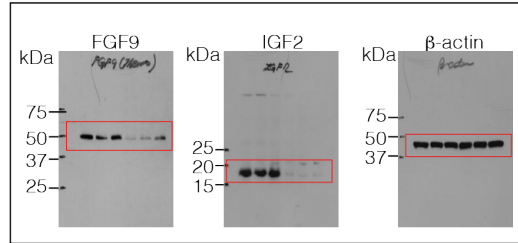

Figure 4B

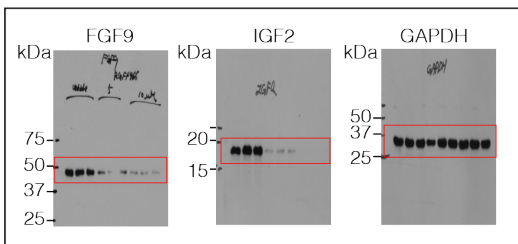

Figure 5D

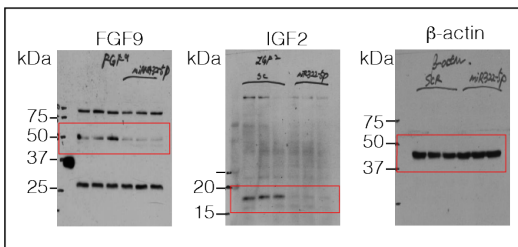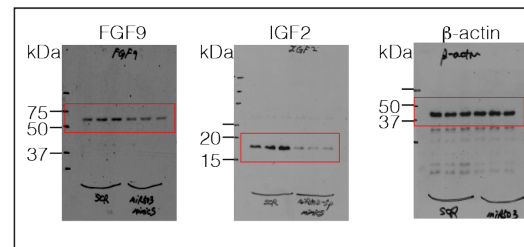

Figure 6B

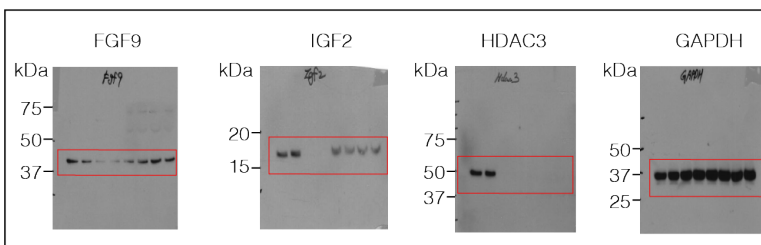

Figure 7A

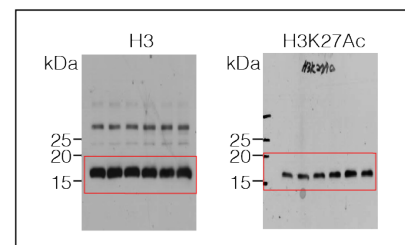

Supplemental Figure 6. Documentation of full scans of Western blots.

**Supplemental Table 1. qRT-PCR primers**

|                     | <b>Forward</b>                     | <b>Reverse</b>                |
|---------------------|------------------------------------|-------------------------------|
| <b><i>Fgf9</i></b>  | 5'-GGGGAGCTGTATGGATCAGA-3'         | 5'-TCCCGTCCTTATTTAATGCAA-3'   |
| <b><i>Igf2</i></b>  | 5'-CGCTTCAGTTTGTCTGTTCG-3'         | 5'-GCAGCACTCTTCCACGATG-3'     |
| <b><i>Gapdh</i></b> | 5'-TCCTGGTATGACAATGAATACGGC-<br>3' | 5'-TCTTGCTCAGTGTCCCTTGCTGG-3' |



**Supplemental Table 2. ChIP qRT-PCR primers**

|                    | <b>Forward</b>              | <b>Reverse</b>              |
|--------------------|-----------------------------|-----------------------------|
| <b>Primer 1</b>    | 5'-GGATGGTTTTTTGTGCTTTCC-3' | 5'-TAAGCCACGCCA CTGAAAAT-3' |
| <b>Primer 2</b>    | 5'-CAACTTAAGGAGTGGGGCTGT-3' | 5'-CAATGAATGCTGGGTCCTTT-3'  |
| <b>Primer 3</b>    | 5'-GCATGGCATCTGCAACATTA-3'  | 5'-CTCACTCCCTGGGTTTGTGT-3'  |
| <b>Gene Desert</b> | 5'-CAGCATGAAAATGGAGGTCA-3'  | 5'-TGAGGGTAAAGGTGCTTGCT-3'  |

**Supplemental Table 3. Antibody used for immunofluorescence or western blot**

| <b>Antibody</b>             | <b>Species</b> | <b>Vendor</b>  | <b>Catalog #</b> |
|-----------------------------|----------------|----------------|------------------|
| <b>BrdU</b>                 | Mouse          | eBioscience    | 14-5071-80       |
| <b>p-H3</b>                 | Rabbit         | Cell Signaling | 9701S            |
| <b>ACTC1</b>                | mouse          | ARP            | 03-61075         |
| <b>ACTC1</b>                | Rabbit         | Abcam          | Ab46805          |
| <b>WT1</b>                  | Mouse          | Santa Cruz     | sc-7385          |
| <b>GFP</b>                  | Goat           | Abcam          | ab6673           |
| <b>HDAC3</b>                | Rabbit         | Abcam          | ab7030           |
| <b>HDAC3</b>                | Rabbit         | Santa Cruz     | Sc-11417         |
| <b>CD31</b>                 | Rat            | Dianova        | Dia-310          |
| <b>smMHC11</b>              | Mouse          | Abcam          | Ab683            |
| <b>Vimentin</b>             | Rabbit         | Cell Signaling | 5741             |
| <b>IGF2</b>                 | Goat           | Thermo Fisher  | PA5-47946        |
| <b>FGF9</b>                 | Rabbit         | Abcam          | ab206408         |
| <b>FGF9</b>                 | Mouse          | Santa Cruz     | Sc-8413          |
| <b>FGFR1</b>                | Rabbit         | Cell Signaling | 9740S            |
| <b>p-FGFR1 (Tyr653/654)</b> | Rabbit         | Cell Signaling | 52598S           |
| <b>IGFR1</b>                | Rabbit         | Cell Signaling | 3027S            |
| <b>p-IGFR1</b>              | Rabbit         | Sigma          | SAB4300069       |
| <b>ERK</b>                  | Mouse          | BD Biosciences | 610123           |
| <b>p-ERK</b>                | Rabbit         | Cell Signaling | 9101             |
| <b>H3K27Ac</b>              | Rabbit         | Abcam          | ab4729           |
| <b>H3</b>                   | Rabbit         | Abcam          | ab176842         |
| <b>β-actin</b>              | Rabbit         | Cell Signaling | 4970             |
| <b>GAPDH</b>                | Mouse          | Proteintech    | HRP-60004        |
